# Supplementary material for: From interaction networks to interfaces, scanning intrinsically disordered regions using AlphaFold2
Source: Springer Nature journal article supplement (doi:10.1038/s41467-023-44288-7), 2024-01-18
Supplement: MOESM1 [file 41467_2023_44288_MOESM1_ESM.pdf]

**a** X-ray structure of human MCM2 bound to histones (PDB: 5BNV)

Full-length AF2 model of human MCM2 (AF-P49736-F1-model\_v4)

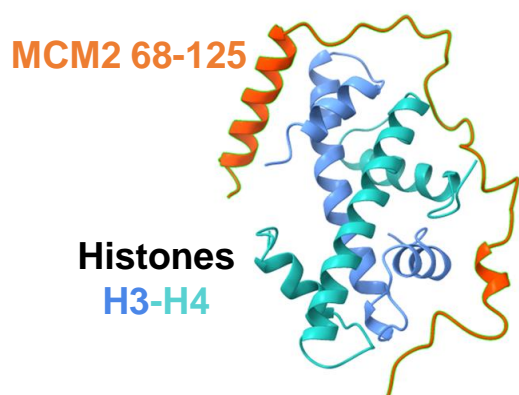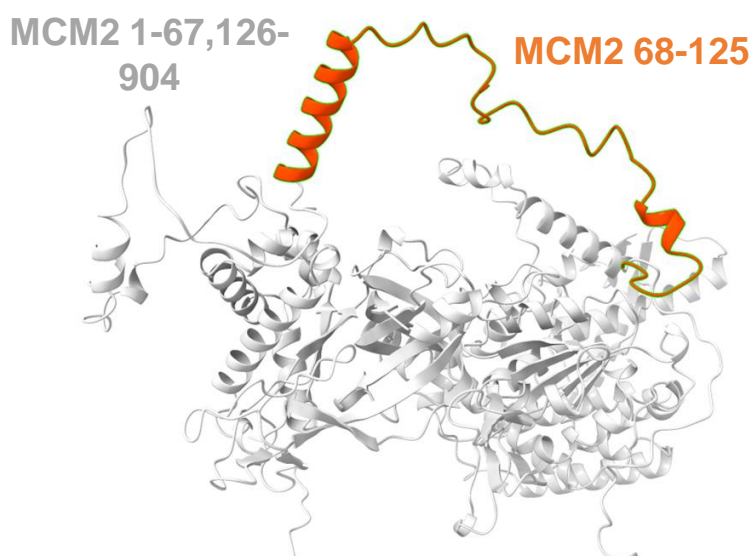

**b**

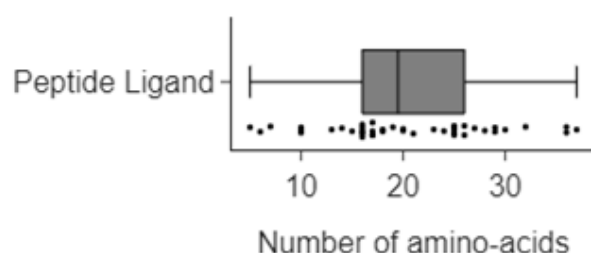

**c**

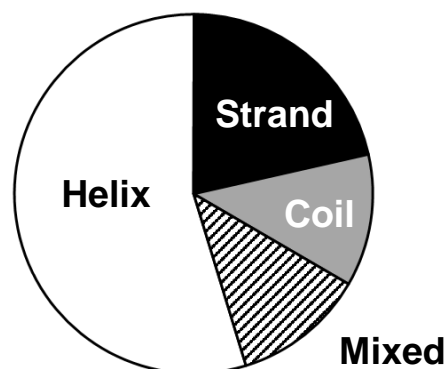

### Supplementary Figure 1. Benchmark dataset construction.

**(a)** (Left) Structure of the intrinsically disordered region (IDR) of human MCM2 (orange) with boundaries [68-125] as experimentally resolved in complex with histones H3 (blue) and H4 (cyan) (PDB: 5BNV) compared (right) to the full AlphaFold model of MCM2 extracted from the AlphaFold database and colored orange in the same boundaries [68-125]. No other structure of this region is available in the PDB. The similarity between the local structures in this stretch highlights that the conformations in the model may be strongly inspired from experimental structures used in the training process of AlphaFold. **(b)** Boxplots representing the size distribution of the 42 peptides in the benchmark data set. **(c)** Classification of the different types of secondary structures observed in the ligands of the 42 complexes in the benchmark database. Four categories were distinguished, peptide structures comprising only helical secondary structure (Helix) or only strand(s) (Strand), peptides binding in the absence of a canonical secondary structure (Coil), and those adopting more complex combinations of the three elements mentioned above (Mixed).

**a**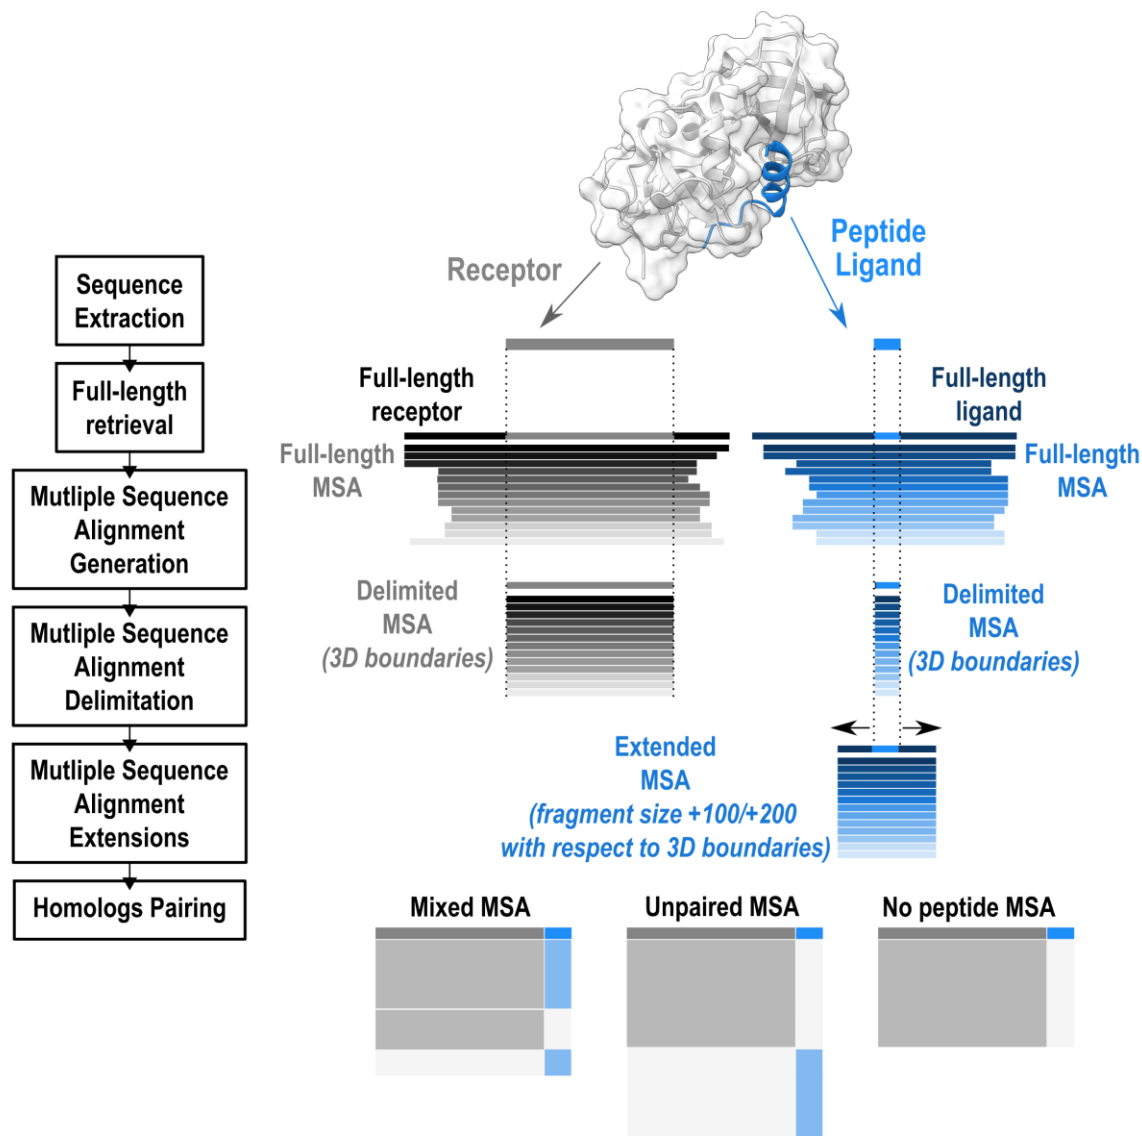**b**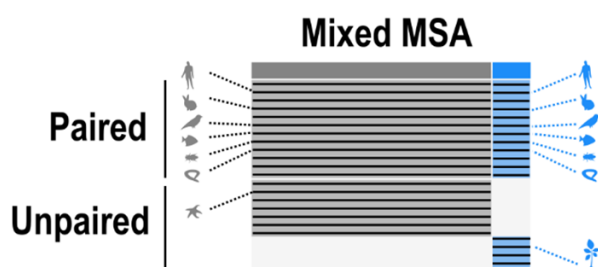

**Supplementary Figure 2. Pipeline for the construction of different multiple sequence alignments used in this study.**

**(a)** General pipeline description with schematic representation of the different steps on the right. First, the full-length sequence is retrieved and used for MSA generation with MMseqs (see Methods). Then, delimited alignments are extracted by retrieving only columns corresponding to positions present in the 3D structure. For some predictions, peptide alignments are extended by up to 100 or 200 residue positions. Finally, three modes are used to combine evolutionary information of the receptor and peptide: a mixed alignment in which as many partner sequences as possible are paired while sequences with a single partner homolog present in a species are added as unpaired, a fully unpaired alignment in which no sequences are paired, and a mode with no evolutionary information for the peptide. **(b)** Illustration of the composition of a mixed co-alignment combining paired and unpaired alignments blocks.

### a Full-length Protein Partners

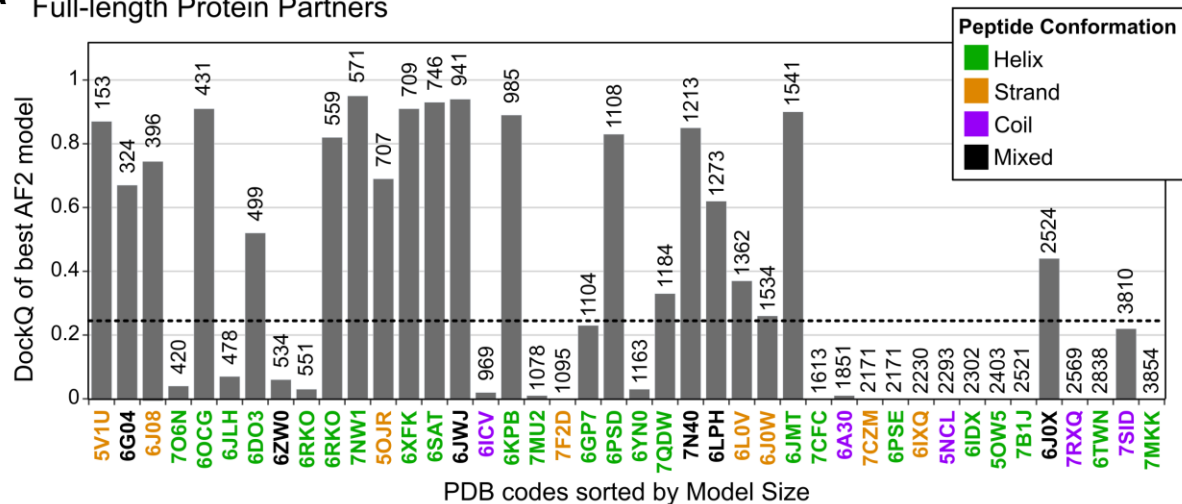

### b Delimited Receptor / Full-length Partner

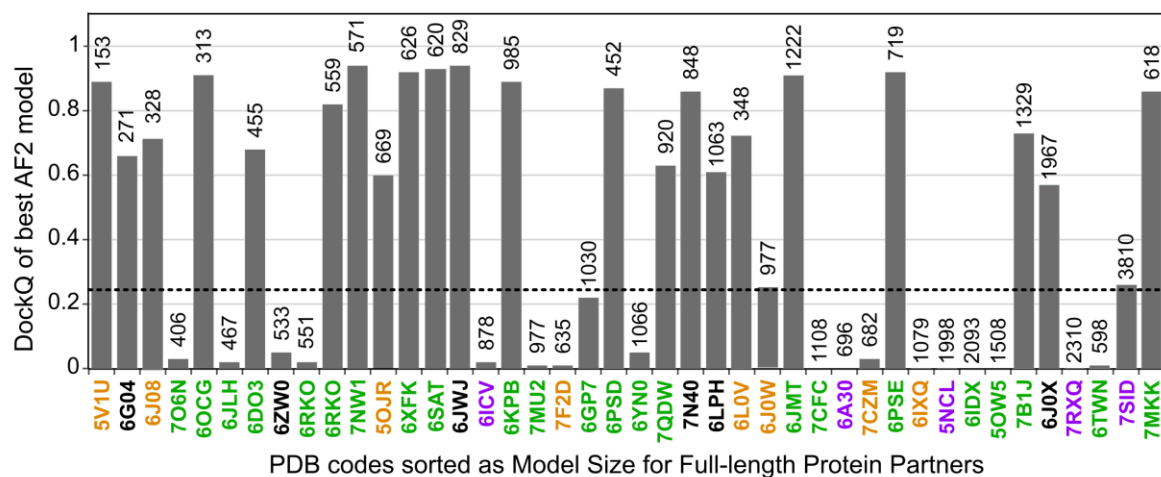

### c Delimited Receptor / Peptide Ligand

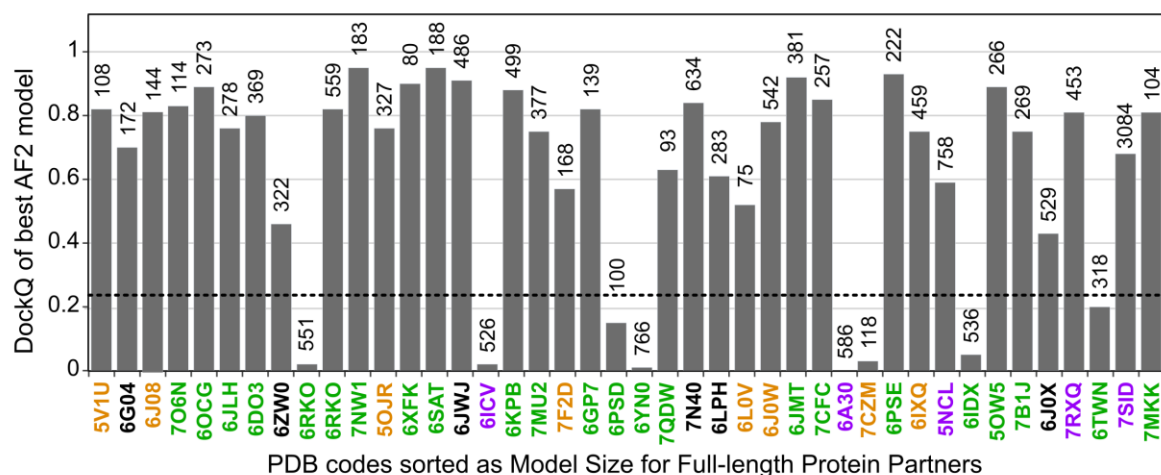

## Supplementary Figure 3. Prediction quality of individual test cases for different prediction modes.

Illustrations of the DockQ score of the best predicted model (chosen as the best AF2 combined score) for each of the 42 test cases. Test cases are identified by their PDB code and sorted by the cumulative length of the full-length input sequences (receptor+ligand) in the three panels a-c. The length of each system in each panel is indicated on top of each bar. PDB codes are color-coded according to the peptide bound conformation: helical (green), strand (orange), coil (purple) or a mixture (black). The dashed line indicates a DockQ score of 0.23, which is the threshold for an acceptable prediction as evaluated on protein-protein complexes (see Methods). Three prediction modes are used: **(a)** full-length partners, **(b)** delimited receptor and full-length ligand and **(c)** delimited receptor and ligand. All predictions in this figure are made with mixed alignments.

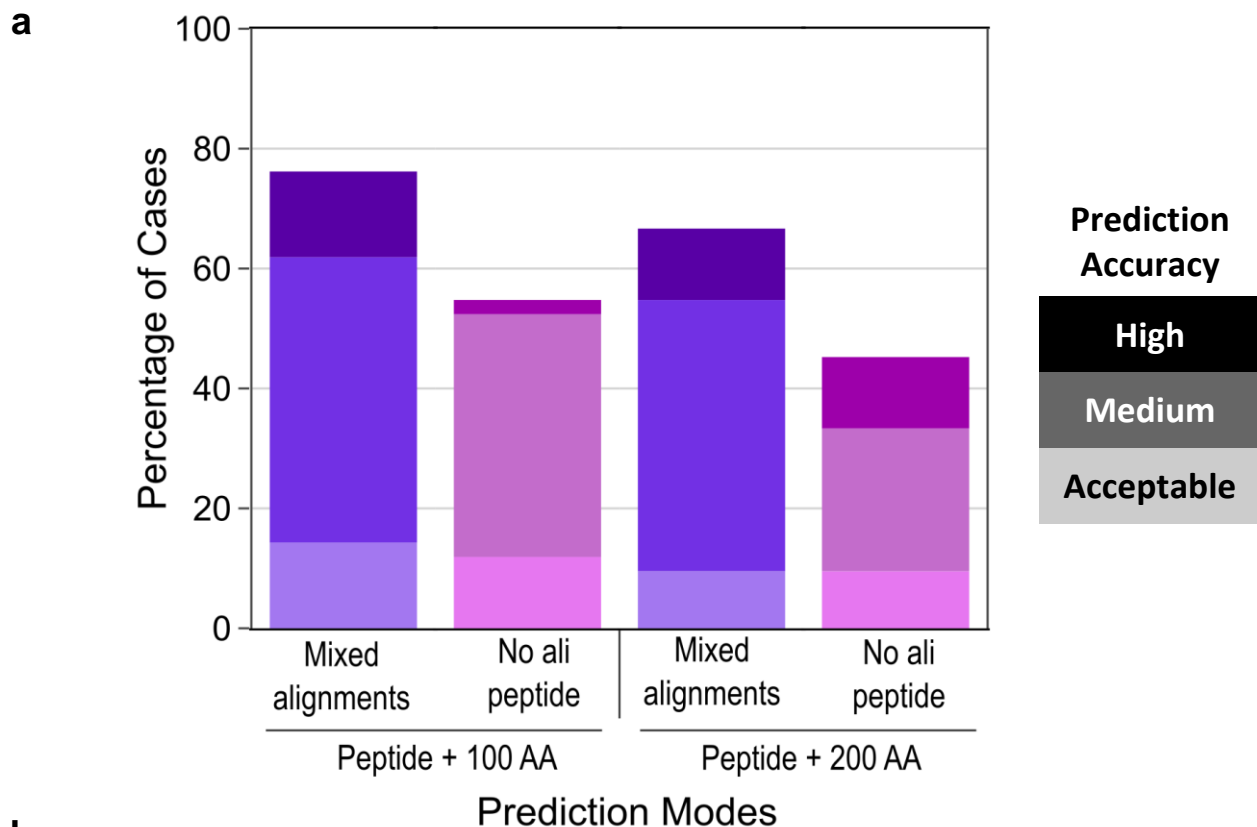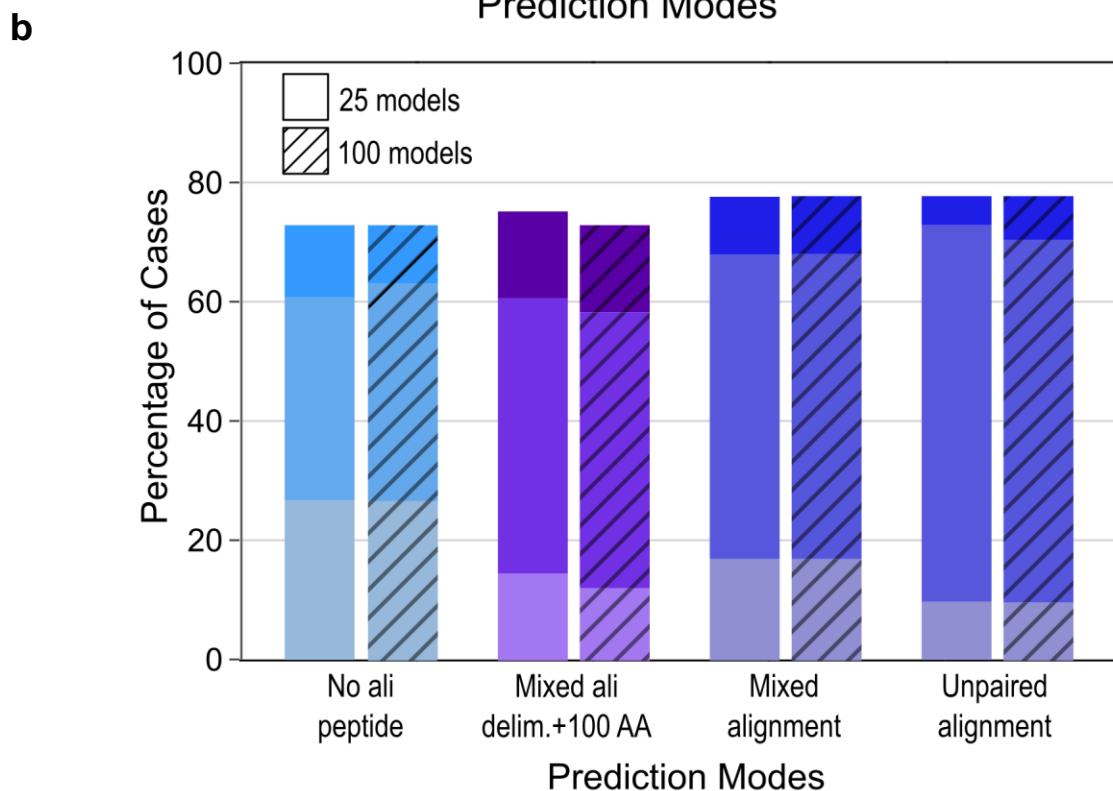

**Supplementary Figure 4. AlphaFold2-Multimer success rates on the benchmark dataset using ligands extended by fragments of size 100 and 200.**

**(a)** Success rates as in main Figure 2, calculated for ligands extended by fragments of size 100 (for the two leftmost bars) and 200 (for the two rightmost bars) with either a mixed alignment or no peptide alignment. **(b)** Success rates calculated for four different alignment protocols with the color code as in main Figure 2 when either 25 (plain bars) or 100 (hatched bars) models were generated.

**a** Homodimer in Xray 7O6N

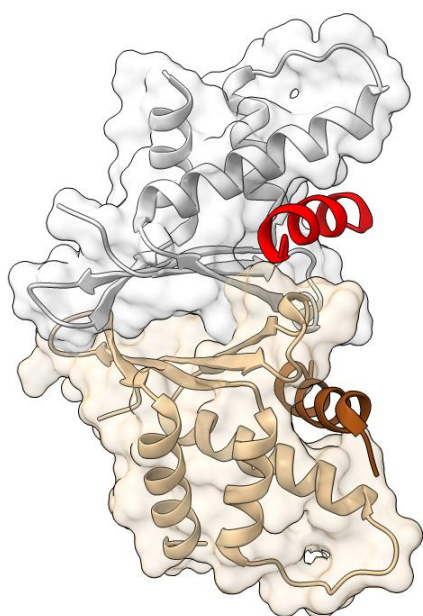

**b** Correct Model  
Mixed MSA  
AF2sc = 0.879

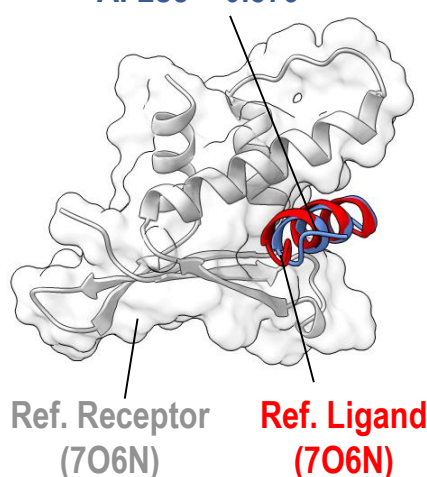

**c** Incorrect Model  
Mixed MSA  
AF2sc = 0.677

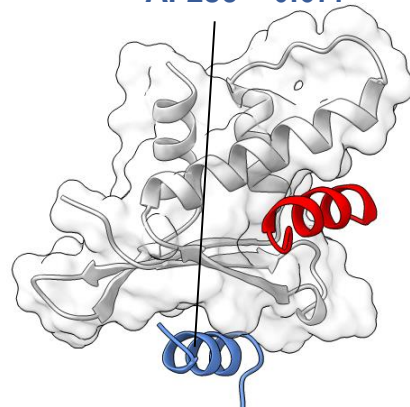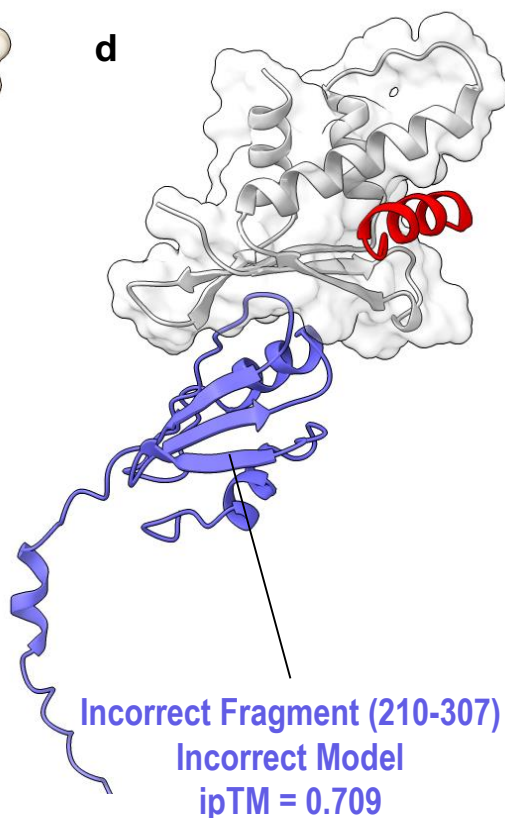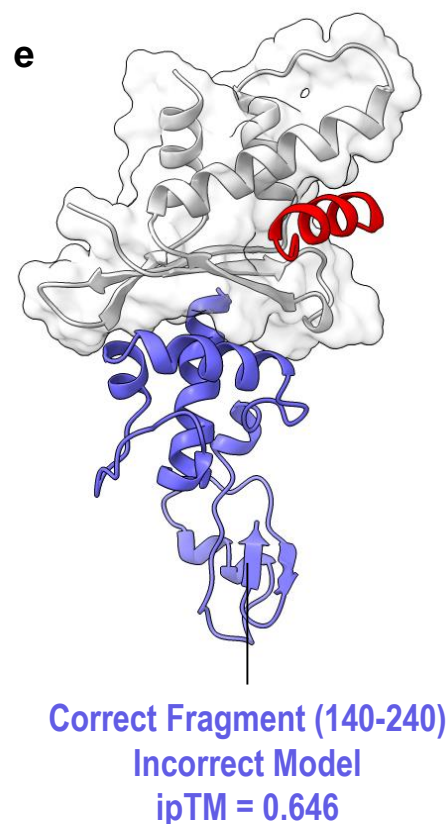

**Supplementary Figure 5. Analysis of the 7O6N test case, failures and success.**

Focus on the test case PDB:7O6N which was not properly predicted when scanning fragments of the ligand protein against the receptor but was correctly predicted when using delimited peptide. **(a)** Surface representation of the reference X-ray structure of the receptor of 7O6N folding as a homodimer (grey and wheat surface color) and bound to its ligand represented as a red and brown cartoon. **(b)** Model obtained using the mixed-delim-delim protocol with the highest AF2 confidence score superimposed on the reference structure (as in panel a) showing a correct prediction. **(c)** Model obtained using the mixed-delim-delim protocol with a moderate AF2 confidence score binding incorrectly to the receptor domain in the surface involved in the formation of the homodimer. **(d)** Model obtained using the ligand fragment with delimitation 210-307 during the scanning protocol which obtained the highest moderate ipTM score of 0.709 (Figure 4c). **(e)** Model obtained using the ligand fragment with delimitation 140-240 during the scanning protocol which obtained the second highest ipTM score of 0.646 and which overlaps with the correct binding site (Figure 4c). Here, the two fragments were incorrectly predicted as they bound a surface normally involved in the formation of the homodimer. Without modeling the receptor as a homodimer, AF2 is misled regarding the location of the proper binding site as the ligand size is increased.



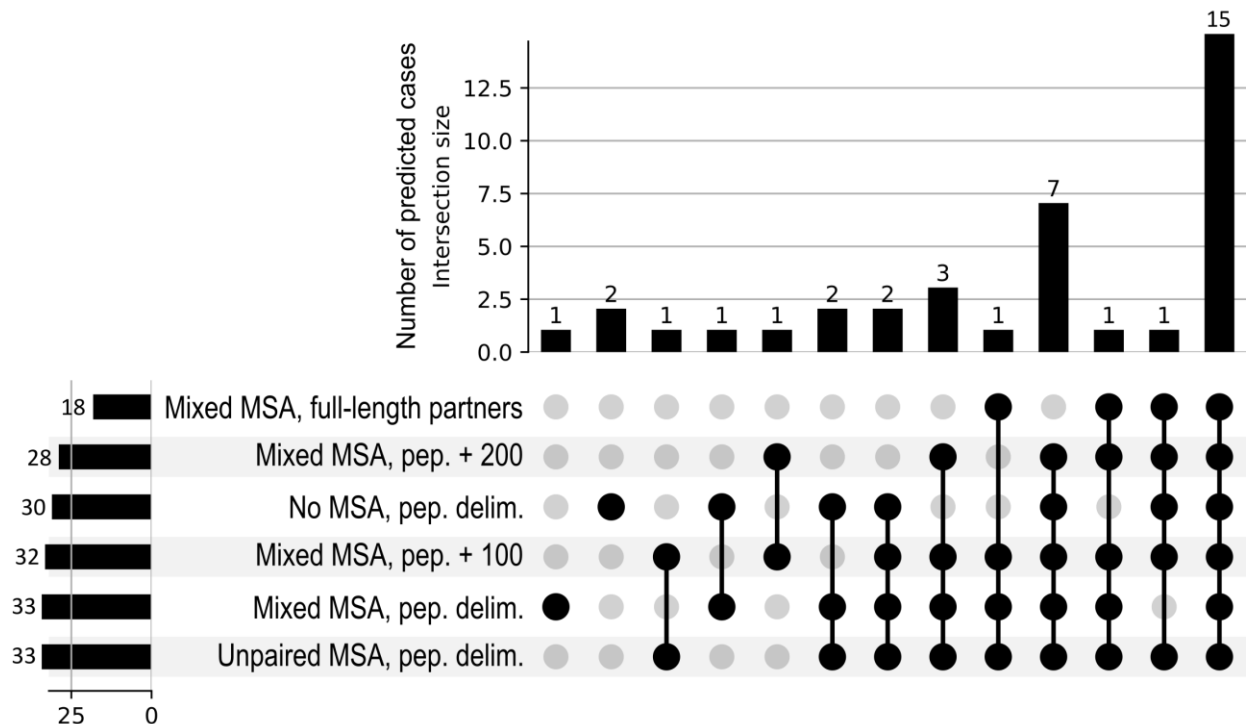

**Supplementary Figure 6. Comparison of successful predictions in different prediction modes.** UpSet diagram as in Figure 4a for different prediction modes: full-length with mixed alignment, delimited receptor with a ligand extended by a fragment of size 200 with mixed alignment, delimited receptor and peptide without MSA for the peptide, delimited receptor with a ligand extended by a fragment of size 100 with mixed alignment, delimited receptor and peptide with mixed alignment and delimited receptor and peptide with unpaired alignment.

**a. Interfaces involving the folding of a short-length helix ligand (5-6 res.)**

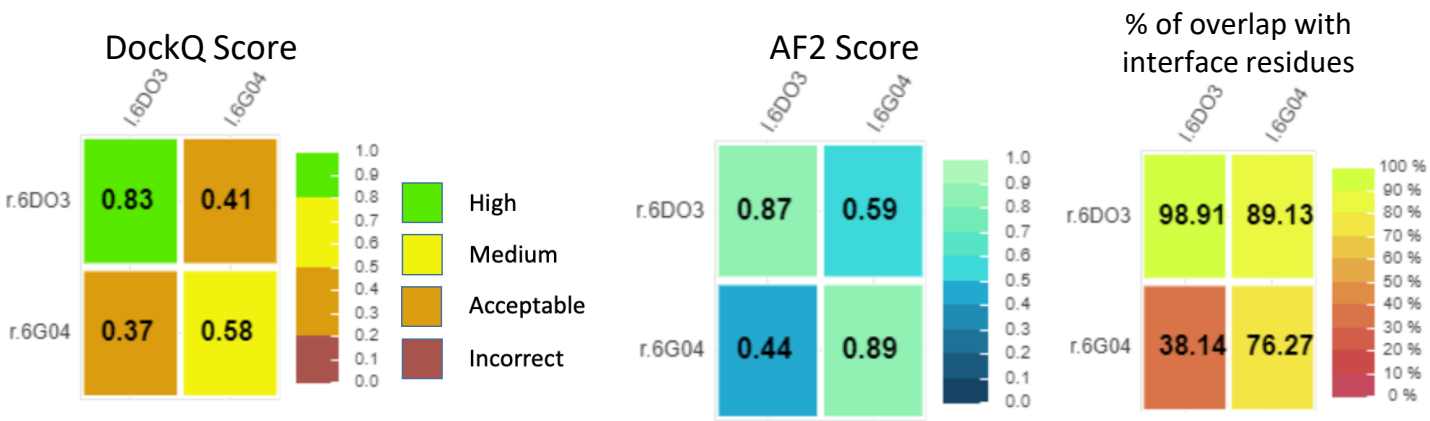

**b. Interfaces involving the folding of a medium-length helix ligand (9-11 res.)**

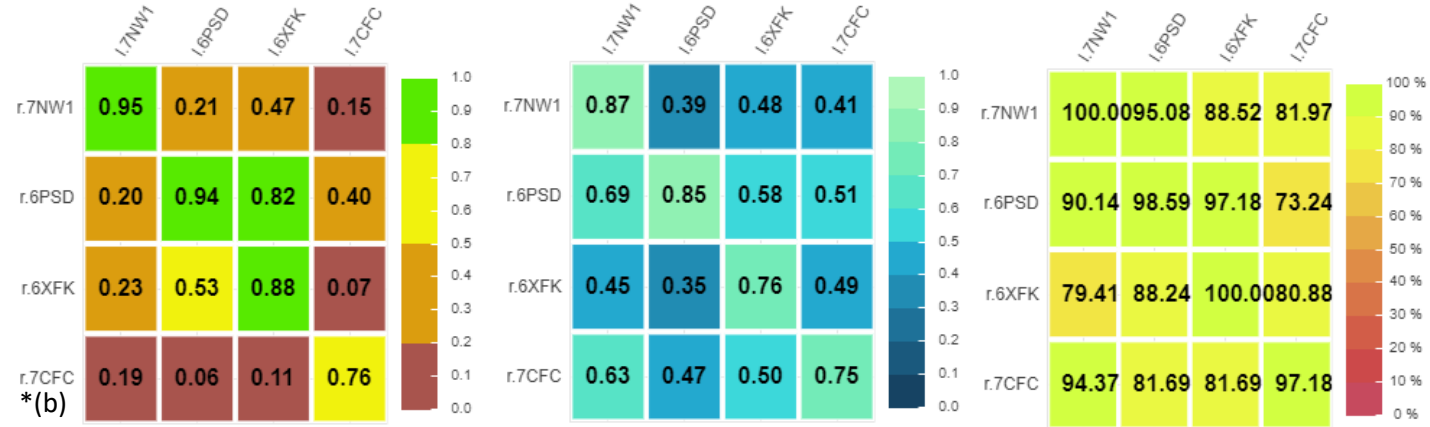

**c. Interfaces involving the folding of a long-length helix ligand (12-16 res.)**

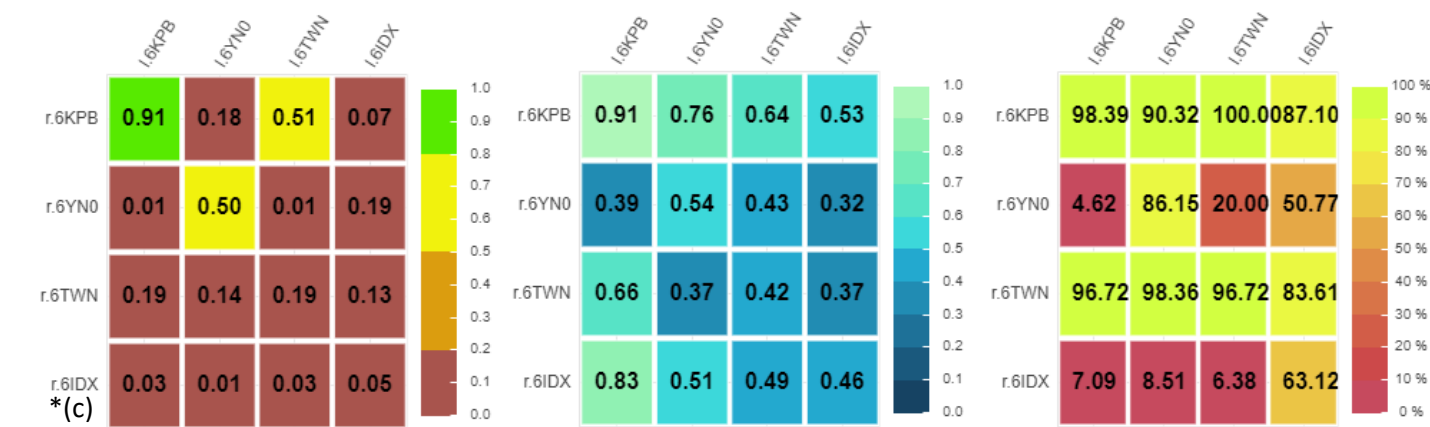

**d. Interfaces involving the folding of a coil ligand**

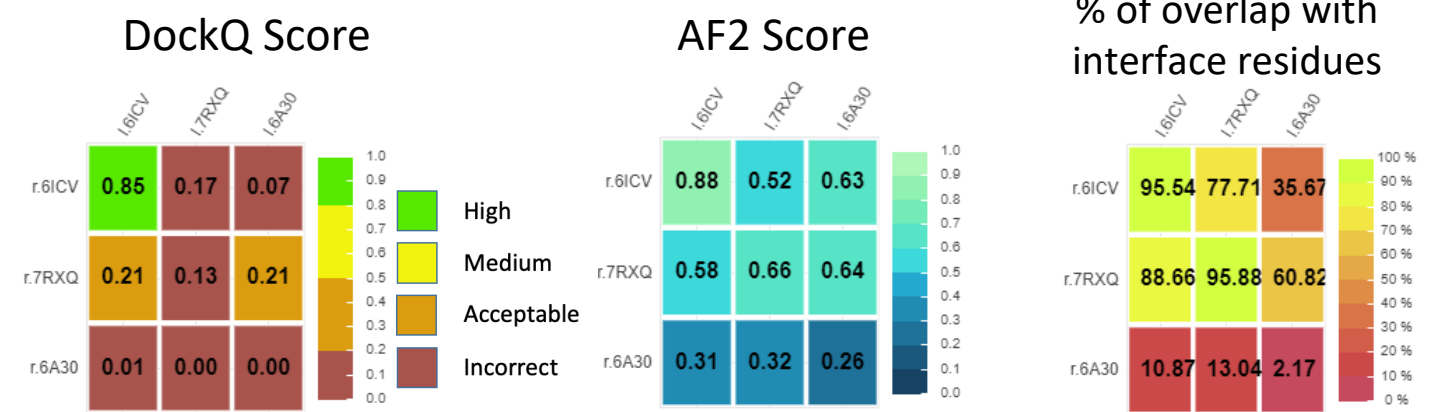

**e. Interfaces involving the folding of a helix + strand ligand**

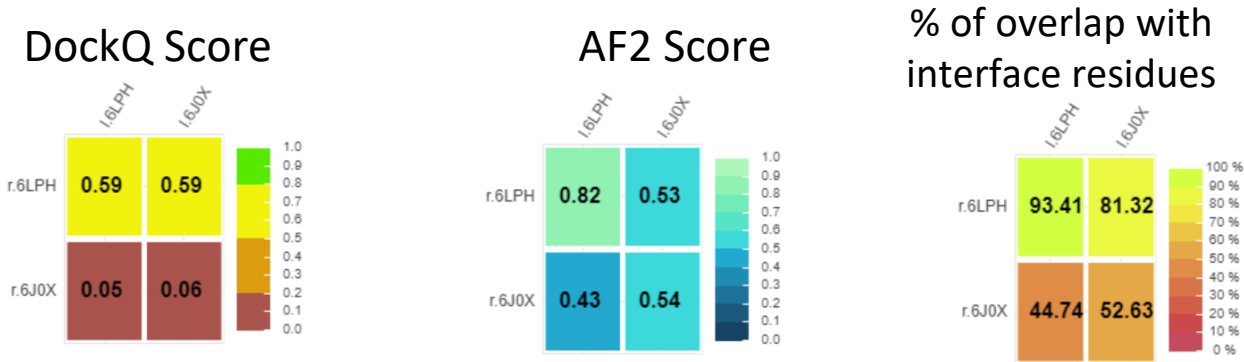

**f. Interfaces involving the folding of a single strand ligand (2-3 res.)**

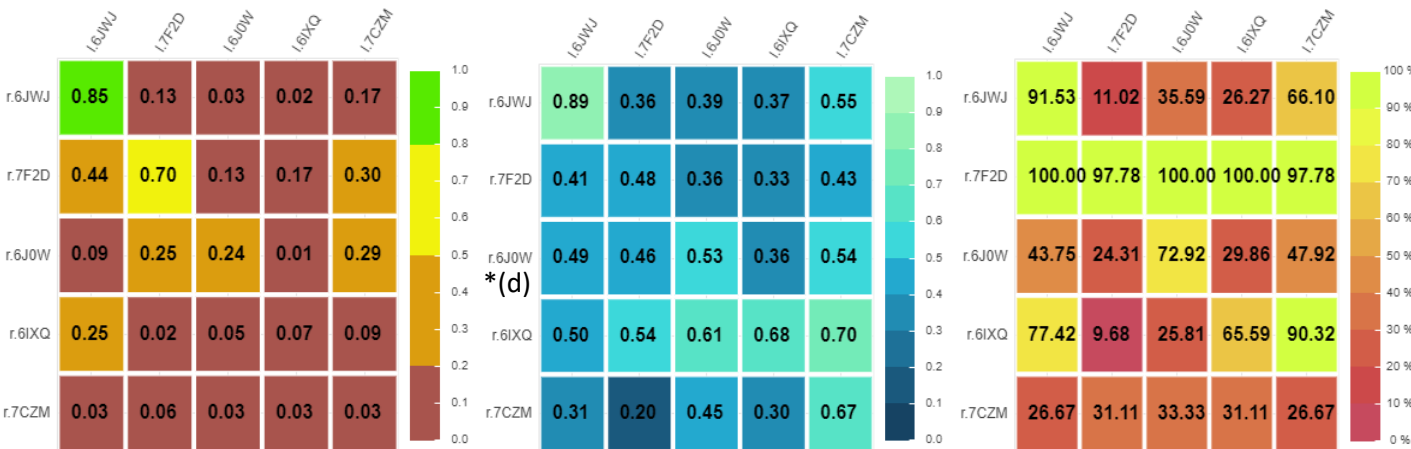



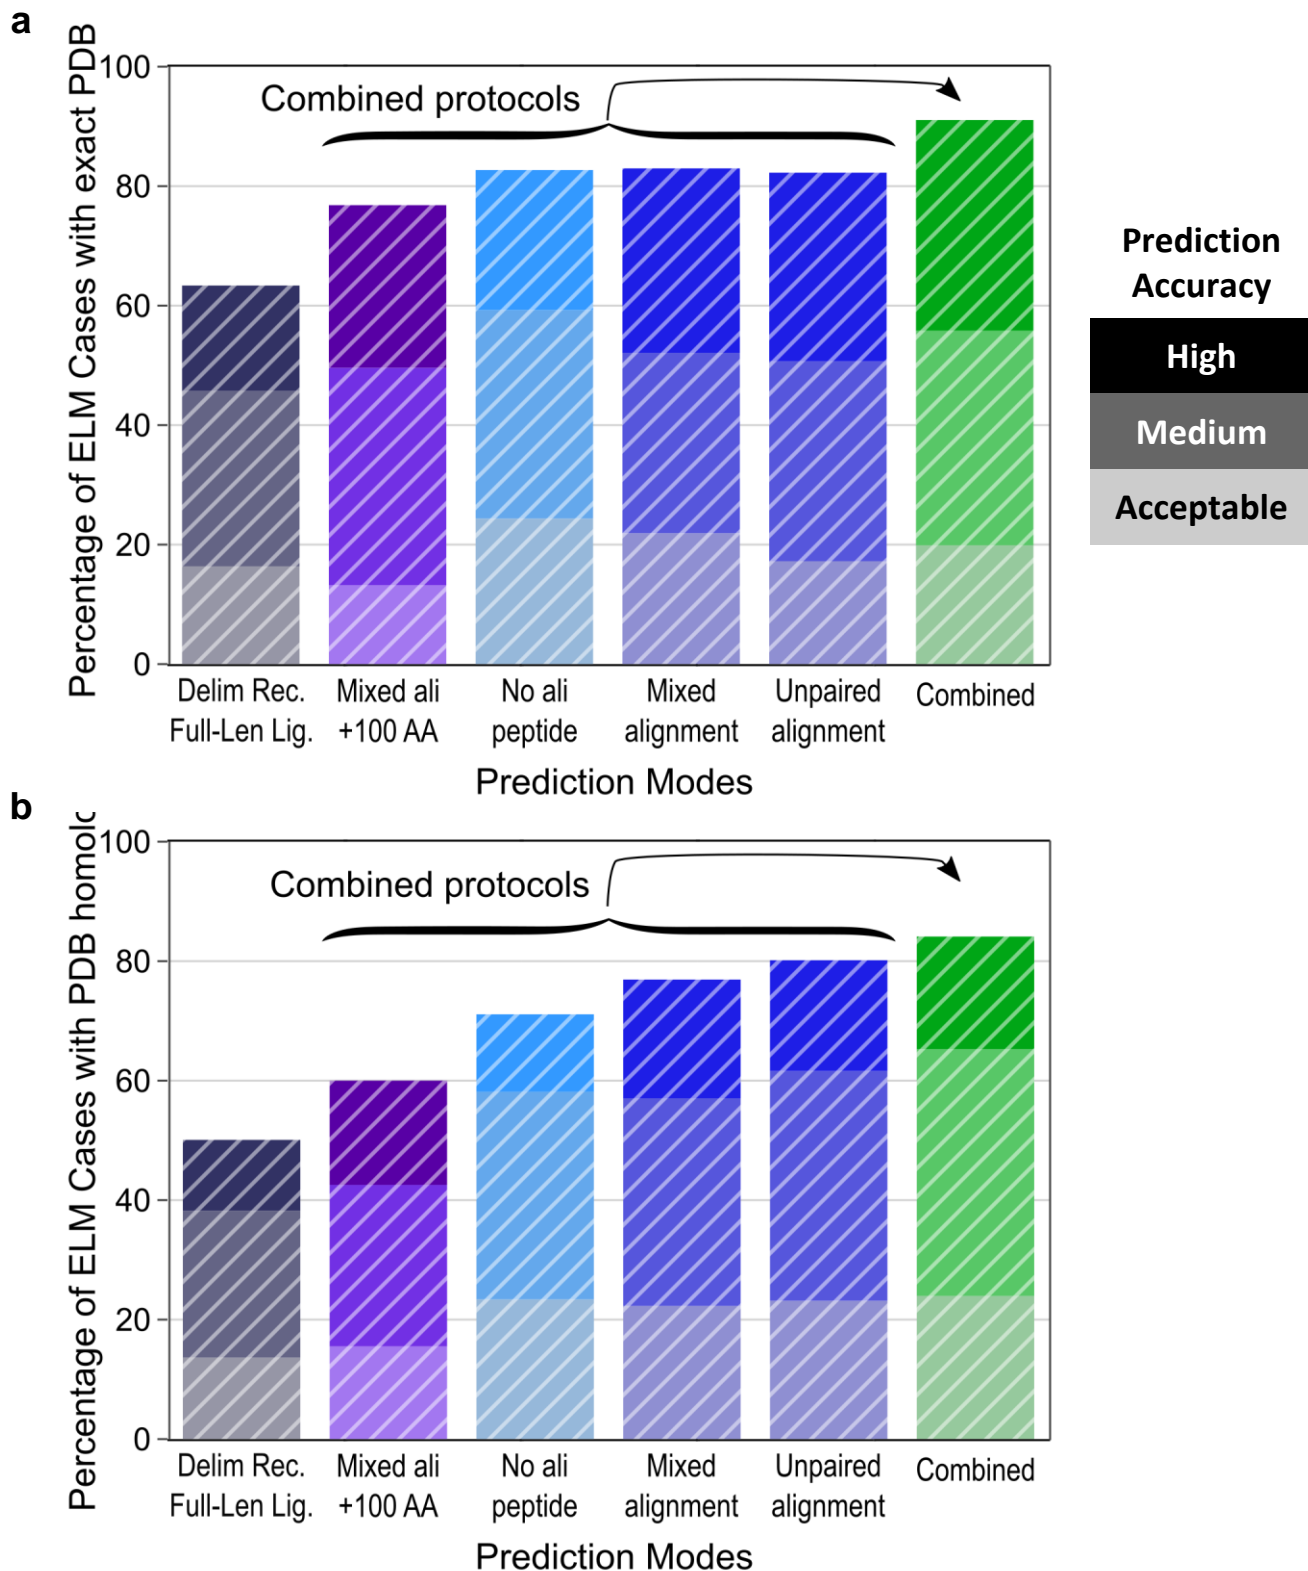

**Supplementary Figure 8. Success rates on two subsets of the ELM dataset, with either an identified exact PDB reference or at least one identified homologous PDB reference.**

As in Figure 8, the histograms represent the mean success rates obtained from the bootstrap sampling of 1000 iterations over the ELM categories, randomly selecting one ELM complex in each of the categories. At every iteration, success rates were calculated and the mean success rate value is reported in the histogram where the best AF2-Multimer model (best AF2 confidence score) is of Acceptable (light color), Medium (medium color) or High (dark color) quality according to the CAPRI criteria for protein-peptide complexes (see Methods). Six different protocols were assessed and their average success rates reported with same color codes as in Figures 2 and 5. **(a)** The sampling was carried out exclusively among ELM cases for which an exact PDB reference was available. There were 79 ELM categories with at least one exact PDB reference. **(b)** The sampling was carried out exclusively among ELM cases for which a homologous PDB reference was available. There were 73 ELM categories with at least one homologous PDB reference.

**Supplementary Table 1: Table of the 42 test cases with their main characteristics**

# INDEX: Index of the case in benchmark dataset  
# PDB: Reference of the experimental structure used for validation  
# CHAIN: Label of the chain used in the reference structure  
# REC/LIG: Status of the molecule either receptor or ligand. A case can have several receptor in case of homodimers or heterodimers  
# UNIPROT: Reference sequence Uniprot index used to generate the multiple sequence alignments  
# START: Index of the first residue modeled in the delimited conditions as defined in the SEQRES PDB parameter  
# STOP: Index of the last residue modeled in the delimited conditions as defined in the SEQRES PDB parameter  
# DELIM\_LEN: Length of the chain in the delimited condition  
# FULL\_LENGTH: Full length of the protein sequence as defined in Uniprot  
# SS\_TYPE: Secondary structures of ligand in the reference complex. Numbers in brackets report the length of each secondary struct. element

| #INDEX | PDB  | CHAIN | REC/LIG  | UNIPROT    | START | STOP | DELIM_LENGTH | FULL_LENGTH | SS_TYPE                                          |
|--------|------|-------|----------|------------|-------|------|--------------|-------------|--------------------------------------------------|
| 1      | 5NCL | A     | receptor | P53894     | 251   | 756  | 506          | 756         | -                                                |
| 1      | 5NCL | B     | receptor | P43563     | 46    | 287  | 242          | 287         | -                                                |
| 1      | 5NCL | D     | ligand   | P24276     | 205   | 214  | 10           | 1250        | coil                                             |
| 2      | 5OJR | A     | receptor | Q8DI95     | 39    | 347  | 309          | 347         | -                                                |
| 2      | 5OJR | E     | ligand   | Q8DIV4     | 335   | 352  | 18           | 360         | strand (3) + strand (3)                          |
| 3      | 5V1U | A     | receptor | D1CIZ5     | 1     | 88   | 88           | 88          | -                                                |
| 3      | 5V1U | E     | ligand   | D1CIY7     | 1     | 20   | 20           | 65          | strand (2) + strand (6)                          |
| 4      | 6A3O | A     | receptor | Q62768     | 944   | 1523 | 580          | 1735        | -                                                |
| 4      | 6A3O | P     | ligand   | P63045     | 87    | 92   | 6            | 116         | coil                                             |
| 5      | 6DO3 | A     | receptor | Q9Y2U9     | 1     | 362  | 362          | 406         | -                                                |
| 5      | 6DO3 | C     | ligand   | Q9Y6D0     | 85    | 91   | 7            | 93          | helical (5)                                      |
| 6      | 6G04 | A     | receptor | Q06672     | 1     | 152  | 152          | 205         | -                                                |
| 6      | 6G04 | B     | ligand   | P39938     | 100   | 119  | 20           | 119         | helix (6) + coil                                 |
| 7      | 6ICV | A     | receptor | Q86TU7     | 1     | 503  | 503          | 594         | -                                                |
| 7      | 6ICV | C     | ligand   | P60709     | 66    | 88   | 23           | 375         | coil                                             |
| 8      | 6IDX | A     | receptor | Q96IJ3     | 5     | 515  | 511          | 720         | -                                                |
| 8      | 6IDX | C     | ligand   | Q3UHD1     | 1471  | 1495 | 25           | 1582        | helix (16)                                       |
| 9      | 6IXQ | A     | receptor | P19524     | 1152  | 1574 | 423          | 1574        | -                                                |
| 9      | 6IXQ | B     | ligand   | P32364     | 615   | 650  | 36           | 656         | strand (2)                                       |
| 10     | 6JOW | A     | receptor | P38850     | 1     | 513  | 513          | 1070        | -                                                |
| 10     | 6JOW | C     | ligand   | P40026     | 13    | 41   | 29           | 464         | strand (3)                                       |
| 11     | 6J0X | A     | receptor | P38850     | 1     | 513  | 513          | 1070        | -                                                |
| 11     | 6J0X | E     | ligand   | Q06164     | 22    | 37   | 16           | 1454        | strand (3) + helix (5)                           |
| 12     | 6JLH | A     | receptor | Q5XJX1     | 7     | 267  | 261          | 272         | -                                                |
| 12     | 6JLH | B     | ligand   | P60880     | 154   | 170  | 17           | 206         | helix (16)                                       |
| 13     | 6JWJ | A     | receptor | P33755     | 113   | 580  | 468          | 580         | -                                                |
| 13     | 6JWJ | C     | ligand   | P53044     | 288   | 305  | 18           | 361         | strand (3) + coil                                |
| 14     | 6KPB | C     | receptor | Q9LPR8     | 1     | 482  | 482          | 482         | -                                                |
| 14     | 6KPB | B     | ligand   | Q700D2     | 367   | 383  | 17           | 503         | helix (13)                                       |
| 15     | 6LOV | A     | receptor | F4K0X5     | 1006  | 1066 | 61           | 1075        | -                                                |
| 15     | 6LOV | B     | ligand   | Q5XVG3     | 274   | 287  | 14           | 287         | strand (3) + strand (5)                          |
| 16     | 6LPH | A     | receptor | Q9VG38     | 1     | 258  | 258          | 468         | -                                                |
| 16     | 6LPH | B     | ligand   | P23647     | 363   | 387  | 25           | 805         | strand (5) + helix (5)                           |
| 17     | 6OCG | A     | receptor | Q7L8A9     | 59    | 305  | 247          | 365         | -                                                |
| 17     | 6OCG | B     | ligand   | Q8N300     | 26    | 51   | 26           | 66          | helix (25)                                       |
| 18     | 6PSD | G     | receptor | Q9BSW2     | 47    | 121  | 75           | 731         | -                                                |
| 18     | 6PSD | H     | ligand   | B3KM42     | 287   | 311  | 25           | 377         | helix (10)                                       |
| 19     | 6PSE | A     | receptor | Q8TD16     | 1     | 98   | 98           | 824         | -                                                |
| 19     | 6PSE | B     | receptor | Q8TD16     | 1     | 98   | 98           | 824         | -                                                |
| 19     | 6PSE | C     | ligand   | Q9Y6G9     | 433   | 458  | 26           | 523         | helix (10)                                       |
| 20     | 6RKO | A     | receptor | P0ABJ9     | 1     | 522  | 522          | 522         | -                                                |
| 20     | 6RKO | H     | ligand   | A5A618     | 1     | 29   | 29           | 29          | helix (25)                                       |
| 21     | 6RKO | A     | receptor | P0ABJ9     | 1     | 522  | 522          | 522         | -                                                |
| 21     | 6RKO | X     | ligand   | P56100     | 1     | 37   | 37           | 37          | helix (24)                                       |
| 22     | 6SAT | A     | receptor | Q8NNN6     | 64    | 152  | 89           | 152         | -                                                |
| 22     | 6SAT | B     | receptor | Q8NNN6     | 64    | 152  | 89           | 152         | -                                                |
| 22     | 6SAT | P     | ligand   | P94337     | 433   | 442  | 10           | 442         | helix (5)                                        |
| 23     | 6TWN | B     | receptor | P26039     | 1359  | 1659 | 301          | 2541        | -                                                |
| 23     | 6TWN | C     | ligand   | P06493     | 207   | 223  | 17           | 297         | helix (14)                                       |
| 24     | 6XFK | A     | receptor | P0CL43     | 84    | 147  | 64           | 147         | -                                                |
| 24     | 6XFK | B     | ligand   | P35672     | 543   | 558  | 16           | 562         | helix (10)                                       |
| 25     | 6YNO | A     | receptor | P02919     | 58    | 804  | 747          | 844         | -                                                |
| 25     | 6YNO | B     | ligand   | P29131     | 75    | 93   | 19           | 319         | helix (12)                                       |
| 26     | 7B1J | A     | receptor | Q9Y6D9     | 597   | 718  | 122          | 718         | -                                                |
| 26     | 7B1J | B     | receptor | Q9Y6D9     | 597   | 718  | 122          | 718         | -                                                |
| 26     | 7B1J | C     | ligand   | Q43683     | 455   | 479  | 25           | 1085        | helix (15)                                       |
| 27     | 7CFC | A     | receptor | A1ZAC4     | 272   | 512  | 241          | 746         | -                                                |
| 27     | 7CFC | F     | ligand   | Q7PLK0     | 63    | 78   | 16           | 867         | helix (9)                                        |
| 28     | 7CZM | A     | receptor | Q8TDY2     | 1490  | 1594 | 105          | 1594        | -                                                |
| 28     | 7CZM | C     | ligand   | Q96CV9     | 173   | 185  | 13           | 577         | strand (3)                                       |
| 29     | 7F2D | A     | receptor | P93026     | 20    | 182  | 163          | 623         | -                                                |
| 29     | 7F2D | B     | ligand   | P15455     | 468   | 472  | 5            | 472         | strand (2)                                       |
| 30     | 7MKK | B     | receptor | Q9W3W6     | 14    | 90   | 77           | 3313        | -                                                |
| 30     | 7MKK | C     | ligand   | Q9W2H9     | 83    | 109  | 27           | 541         | helix (18)                                       |
| 31     | 7MU2 | A     | receptor | Q9Y4P8     | 11    | 363  | 353          | 454         | -                                                |
| 31     | 7MU2 | B     | ligand   | E7EVC7     | 207   | 230  | 24           | 624         | helix (19)                                       |
| 32     | 7NW1 | AAA   | receptor | Q9Y3C8     | 1     | 167  | 167          | 167         | -                                                |
| 32     | 7NW1 | FFF   | ligand   | Q9GZ29     | 389   | 404  | 16           | 404         | helix (11)                                       |
| 33     | 7QDW | A     | receptor | Q8I2Y4     | 265   | 332  | 68           | 332         | -                                                |
| 33     | 7QDW | B     | ligand   | Q8IK99     | 817   | 841  | 25           | 852         | helix (18)                                       |
| 34     | 7RXQ | A     | receptor | Q9BR39     | 1     | 437  | 437          | 696         | -                                                |
| 34     | 7RXQ | B     | ligand   | P07293     | 1594  | 1609 | 16           | 1873        | coil                                             |
| 35     | 7SID | A     | receptor | Q13315     | 1     | 3056 | 3056         | 3056        | -                                                |
| 35     | 7SID | B     | ligand   | O60934     | 727   | 754  | 28           | 754         | coil                                             |
| 36     | 6I08 | A     | receptor | Q3KP22-3   | 2     | 109  | 108          | 176         | -                                                |
| 36     | 6I08 | D     | ligand   | Q8NHR7     | 174   | 209  | 36           | 220         | strand (2) + strand (3) + strand (5)             |
| 37     | 6ZW0 | A     | receptor | Q57968     | 2     | 293  | 292          | 293         | -                                                |
| 37     | 6ZW0 | C     | ligand   | Q58261     | 140   | 169  | 30           | 241         | helix (8) + strand (3) + strand (4)              |
| 38     | 7N4O | A     | receptor | Q09028     | 1     | 425  | 425          | 425         | -                                                |
| 38     | 7N4O | B     | receptor | Q5TKA1     | 98    | 274  | 177          | 542         | -                                                |
| 38     | 7N4O | C     | ligand   | Q96GY3     | 95    | 126  | 32           | 246         | strand (4) + strand (4) + helix (3) + helix (11) |
| 39     | 7O6N | A     | receptor | Q20057     | 1     | 99   | 99           | 113         | -                                                |
| 39     | 7O6N | D     | ligand   | O76616     | 179   | 193  | 15           | 307         | helix (14)                                       |
| 40     | 5OW5 | A     | receptor | Q8BG40     | 481   | 658  | 178          | 658         | -                                                |
| 40     | 5OW5 | B     | receptor | E9P2I6     | 3     | 80   | 78           | 493         | -                                                |
| 40     | 5OW5 | E     | ligand   | Q80VC9     | 461   | 470  | 10           | 1252        | helix (9)                                        |
| 41     | 6JMT | A     | receptor | Q80XR8     | 1     | 360  | 360          | 679         | -                                                |
| 41     | 6JMT | L     | ligand   | Q9E528     | 685   | 705  | 21           | 862         | helix (14)                                       |
| 42     | 6GP7 | B     | receptor | P0CI74     | 4     | 64   | 61           | 98          | -                                                |
| 42     | 6GP7 | C     | receptor | P0CI74     | 4     | 64   | 61           | 98          | -                                                |
| 42     | 6GP7 | D     | ligand   | A0A5D4ND23 | 1     | 17   | 17           | 908         | helix (9)                                        |

**Supplementary Table 2: Table of the 7 clusters that were used to sample the cross-partner interactions**

**# Interfaces involving the folding of a short-length helix ligand (5-6 residues)**

| index | pdb  |
|-------|------|
| 5     | 6DO3 |
| 6     | 6G04 |

**# Interfaces involving the folding of a medium-length helix ligand (9-11 residues)**

|    |      |
|----|------|
| 18 | 6PSD |
| 24 | 6XFK |
| 27 | 7CFC |
| 32 | 7NW1 |

**# Interfaces involving the folding of a long-length helix ligand (12-16 residues)**

|    |      |
|----|------|
| 8  | 6IDX |
| 14 | 6KPB |
| 23 | 6TWN |
| 25 | 6YN0 |

**# Interfaces involving the folding of a coil ligand**

|    |      |
|----|------|
| 4  | 6A30 |
| 7  | 6ICV |
| 34 | 7RXQ |

**# Interfaces involving the folding of a helix + strand ligand**

|    |      |
|----|------|
| 11 | 6J0X |
| 16 | 6LPH |

**# Interfaces involving the folding of a single strand ligand (2-3 residues)**

|    |      |
|----|------|
| 9  | 6IXQ |
| 10 | 6J0W |
| 13 | 6JWJ |
| 28 | 7CZM |
| 29 | 7F2D |

**# Interfaces involving the folding of a two-stranded ligand**

|    |      |
|----|------|
| 2  | 5OJR |
| 3  | 5V1U |
| 15 | 6L0V |
